# Supplementary material for: Expression of cartilage oligomeric matrix protein in periampullary adenocarcinoma is associated with pancreatobiliary-type morphology, higher levels of fibrosis and immune cell exclusion
Source: PubMed Central journal article supplement — Oncoimmunology. 2022 Aug 18;11(1):2111906. doi: 10.1080/2162402X.2022.2111906 (PMC9389925; doi:10.1080/2162402x.2022.2111906), 2022-08-18
Supplement: KONI_A_2111906_SM3902.pdf [file KONI_A_2111906_SM3902.pdf]

**Figure S1**

**A**

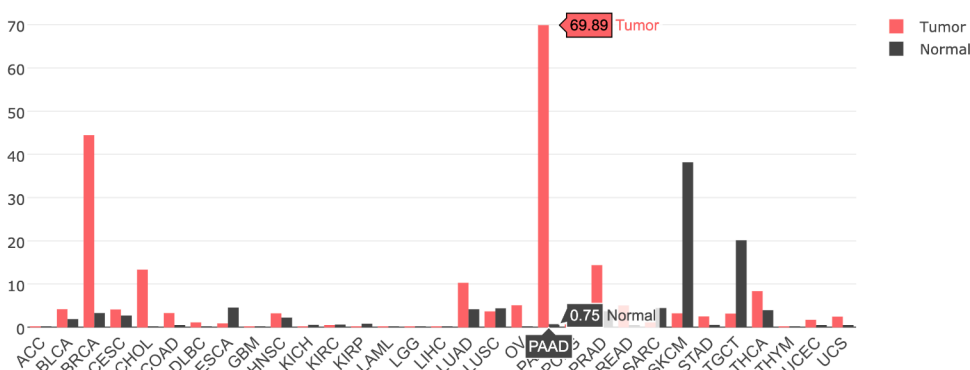

**B**

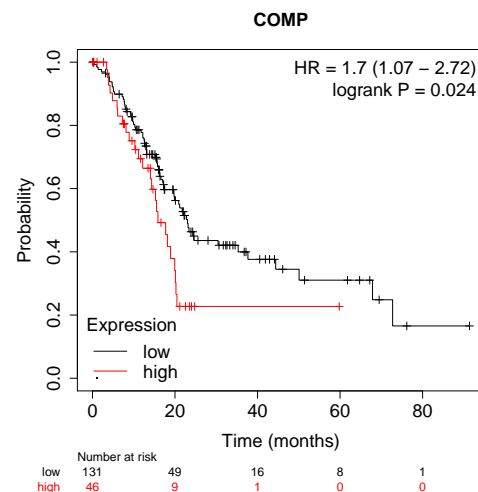

**C**

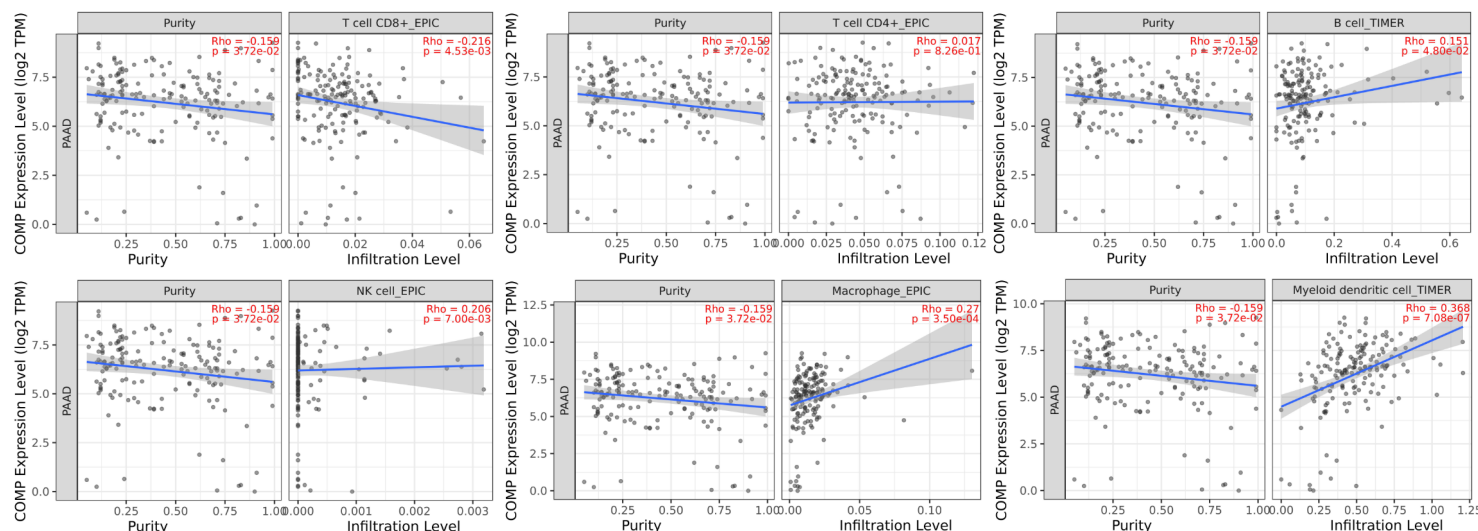

**D**

| Correlated Gene | Cytoband   | Spearman's Correlation | p-Value  | q-Value  |
|-----------------|------------|------------------------|----------|----------|
| COL8A2          | 1p34.3     | 0.677                  | 2.56e-25 | 5.12e-21 |
| COL10A1         | 6q22.1     | 0.608                  | 1.64e-19 | 3.28e-16 |
| COL16A1         | 1p35.2     | 0.596                  | 1.36e-18 | 1.94e-15 |
| COL5A1          | 9q34.3     | 0.565                  | 1.80e-16 | 1.22e-13 |
| COL6A1          | 3q12.1     | 0.560                  | 3.89e-16 | 2.35e-13 |
| COL1A2          | 7q21.3     | 0.555                  | 7.59e-16 | 4.46e-13 |
| COL1A1          | 17q21.33   | 0.553                  | 1.00e-15 | 5.58e-13 |
| COL11A1         | 1p21.1     | 0.551                  | 1.25e-15 | 6.56e-13 |
| COL5A2          | 2q32.2     | 0.522                  | 7.09e-14 | 1.99e-11 |
| COL3A1          | 2q32.2     | 0.510                  | 3.12e-13 | 7.52e-11 |
| PCOLCE          | 7q22.1     | 0.501                  | 8.77e-13 | 1.79e-10 |
| COL4A2          | 13q34      | 0.498                  | 1.27e-12 | 2.47e-10 |
| COL6A3          | 2q37.3     | 0.470                  | 3.05e-11 | 3.89e-9  |
| COL6A2          | 21q22.3    | 0.437                  | 9.53e-10 | 8.16e-8  |
| COL4A1          | 13q34      | 0.433                  | 1.36e-9  | 1.09e-7  |
| COL12A1         | 6p13-q14.1 | 0.431                  | 1.73e-9  | 1.34e-7  |
| COL13A1         | 10q22.1    | 0.390                  | 6.77e-8  | 3.48e-6  |
| COL5A3          | 19p13.2    | 0.364                  | 5.57e-7  | 2.21e-5  |
| COLGALT1        | 19p13.11   | 0.355                  | 1.04e-6  | 3.86e-5  |
| COL24A1         | 1p22.3     | 0.344                  | 2.39e-6  | 7.71e-5  |
| COLEC12         | 18p11.32   | 0.335                  | 4.42e-6  | 1.29e-4  |
| COL6A1          | 21q22.3    | 0.331                  | 5.90e-6  | 1.64e-4  |
| COL15A1         | 9q22.33    | 0.325                  | 8.86e-6  | 2.32e-4  |
| COL18A1         | 21q22.3    | 0.320                  | 1.28e-5  | 3.16e-4  |
| COL14A1         | 8q24.12    | 0.301                  | 4.11e-5  | 8.34e-4  |

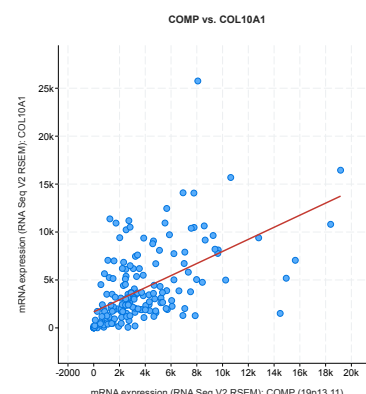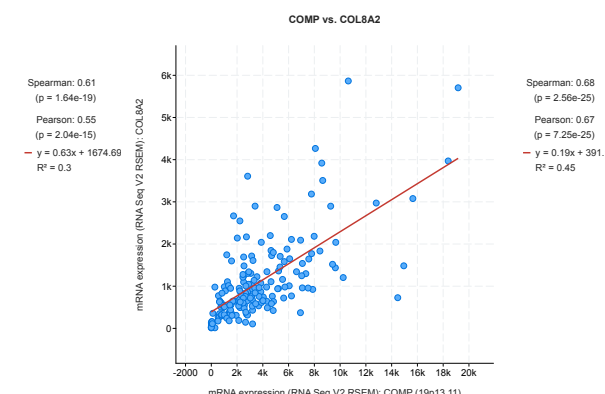

Figure S1 Analyses of COMP expression reported in various databases confirm that COMP is highly expressed in pancreatic cancer where it correlates with patient survival and low immune cell infiltration. (A) Profile of COMP mRNA expression in cancer tissues and in healthy tissue was retrieved from [GEO](#). Notably, high expression of COMP was noted in pancreatic cancer (PAAD) and breast cancer (BRCA). (B) Estimation of survival for pancreatic cancer patients with tumours expressing high and low levels of COMP mRNA using [Kaplan-Meier Plotter for Pan-cancer RNA-seq](#) confirmed association of COMP expression with poor survival. (C) Estimation of infiltrating immune cells populations into pancreatic tumours in relation to COMP mRNA expression using algorithms retrieved from [TIMER 2.0](#). (D) Strong correlation of COMP mRNA expression with mRNA expression levels of several types of collagens, data retrieved from [cBioPortal](#) analysing data sourced from TCGA, PanCancer atlas.

**Figure S2**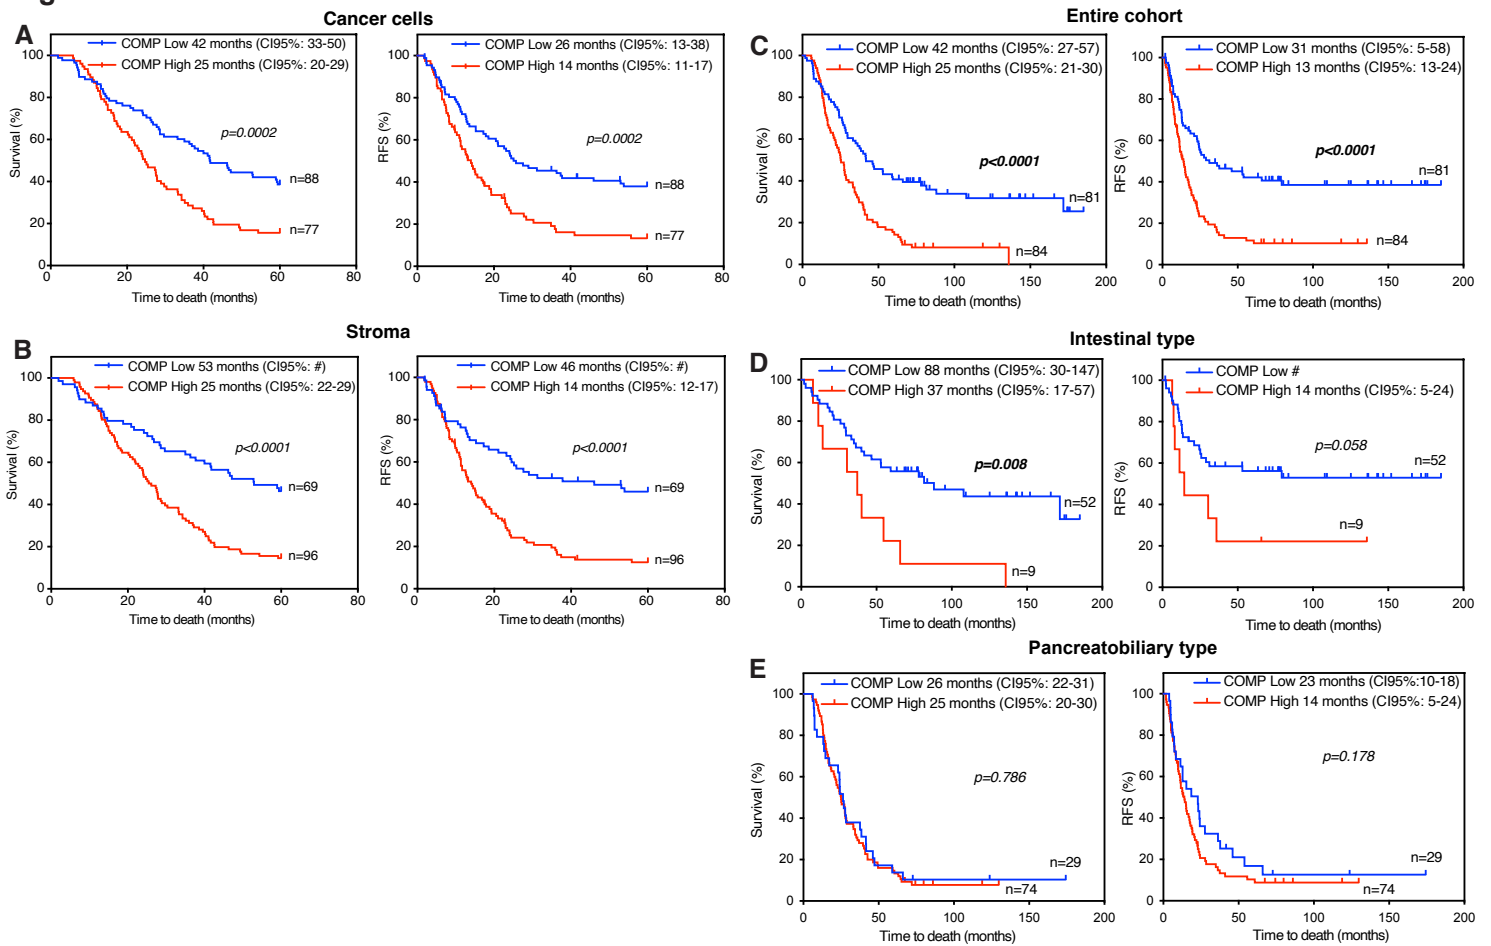

**Figure S2** Estimation of OS and RFS and 5-years post-surgery. Patients were stratified according to COMP expression: low (score 0-1) and high (score 2-3), based on immunohistochemical analysis of tissue microarrays. High expression of COMP from the cancer cells (A) or in the stroma (B) was correlated with decreased OS and RFS of the cancer patients at 5-years post-surgery. QuPath open-source software was used to calculate the percentage of COMP positive cells detected collectively in cancer cells and in stroma. Patients were stratified as low or high COMP expressing according to median. OS and RFS were calculated for the entire cohort (C) and the intestinal (D) and pancreatobiliary (E) types of morphology separately. Kaplan Meier estimation of survival and recurrence was used, with log Rank (Mantel-Cox) pairwise comparisons (# stands for incalculable).

**Figure S3**

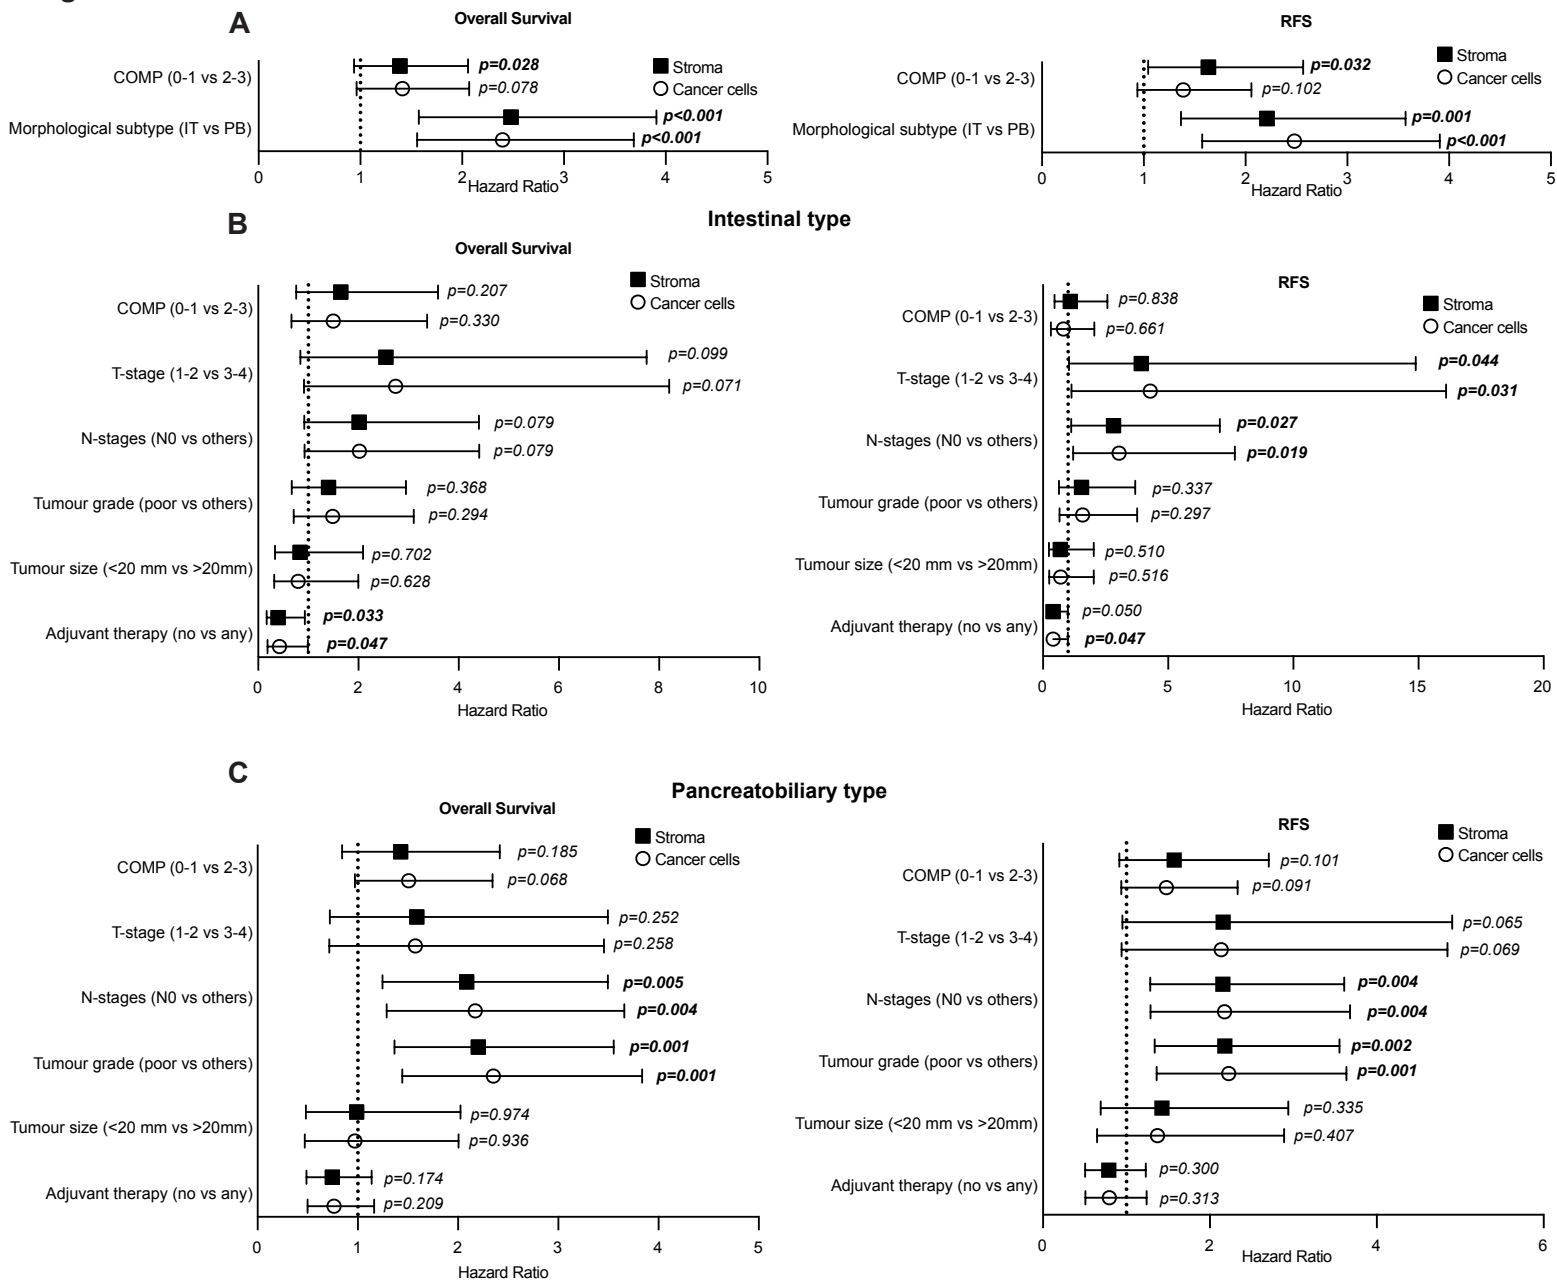

Figure S3 (A) Multivariate Cox analyses of COMP expression by the cancer cells and in stroma together with the type of tumour morphology. Estimation of survival with Cox multivariable analyses for patients with intestinal type (B) and pancreatobiliary type (C) of periampullary adenocarcinoma.

**Figure S4**

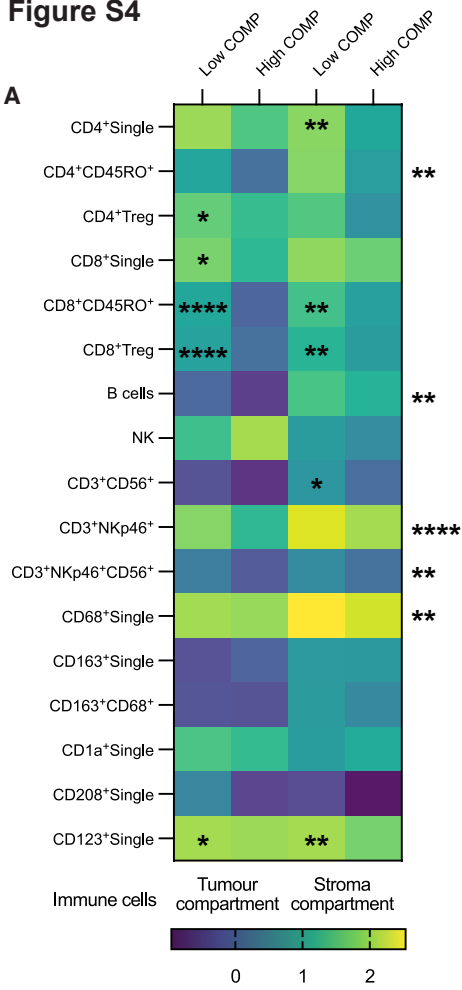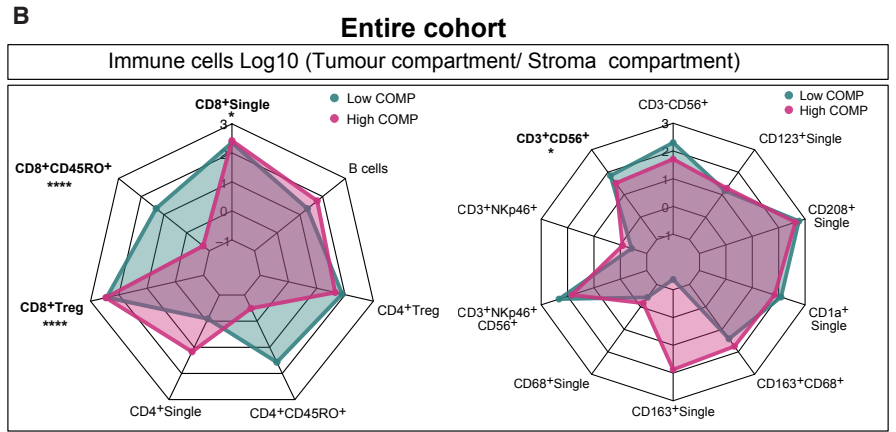

Figure S4 COMP expression was calculated with the QuPath software as a percentage of positive cells found collectively in cancer cells and stroma. (A) The infiltrating immune cells correlated with the expression of COMP. (B) In addition, the tumour to stroma compartment ratio of infiltrating immune cells was calculated, and radar plots illustrate its correlation with COMP expression. Spearman's analysis was used to determine the correlations.

Table S1 Associations of clinicopathological characteristics with COMP expression in patients with intestinal type of tumour morphology.

| Factor                           | Cancer cells |       |           |       | <i>p</i> -value               | Stroma cells |       |           |       | <i>p</i> -value               |
|----------------------------------|--------------|-------|-----------|-------|-------------------------------|--------------|-------|-----------|-------|-------------------------------|
|                                  | COMP low     |       | COMP high |       |                               | COMP low     |       | COMP high |       |                               |
|                                  | N            | (%)   | N         | (%)   |                               | N            | (%)   | N         | (%)   |                               |
| All (N=63)                       | 52           | 82.54 | 11        | 17.46 |                               | 48           | 76.19 | 15        | 23.81 |                               |
| Age at surgery                   |              |       |           |       | 0.746 <sup>b</sup>            |              |       |           |       | 0.369 <sup>b</sup>            |
| <50                              | 6            | 9.5   | 2         | 3.2   |                               | 5            | 7.9   | 3         | 4.8   |                               |
| 50-70                            | 32           | 50.8  | 7         | 11.1  |                               | 29           | 46.0  | 10        | 15.9  |                               |
| >70                              | 14           | 22.2  | 2         | 3.2   |                               | 14           | 22.2  | 2         | 3.2   |                               |
| Sex                              |              |       |           |       | 0.536 <sup>a</sup>            |              |       |           |       | 0.217 <sup>a</sup>            |
| Female                           | 29           | 46.0  | 5         | 7.9   |                               | 28           | 44.4  | 6         | 9.5   |                               |
| Male                             | 23           | 36.5  | 6         | 9.5   |                               | 20           | 31.7  | 9         | 14.3  |                               |
| Adjuvant vs no adjuvant          |              |       |           |       | <b>0.037<sup>a</sup></b>      |              |       |           |       | <b>0.016<sup>a</sup></b>      |
| No adjuvant                      | 40           | 63.5  | 5         | 7.9   |                               | 38           | 60.3  | 7         | 11.1  |                               |
| Adjuvant                         | 12           | 19.0  | 6         | 9.5   |                               | 10           | 15.9  | 8         | 12.7  |                               |
| Anatomical tumour origin         |              |       |           |       | 0.660 <sup>b</sup>            |              |       |           |       | 0.814 <sup>b</sup>            |
| Duodenum                         | 11           | 17.5  | 3         | 4.8   |                               | 11           | 17.5  | 3         | 4.8   |                               |
| Papilla-Ampulla Intestinal       | 41           | 65.1  | 8         | 12.7  |                               | 37           | 58.7  | 12        | 19.0  |                               |
| Papilla-Ampulla Pancreatobiliary | 0            | 0.0   | 0         | 0.0   |                               | 0            | 0.0   | 0         | 0.0   |                               |
| Distal Bile Duct                 | 0            | 0.0   | 0         | 0.0   |                               | 0            | 0.0   | 0         | 0.0   |                               |
| Pancreas                         | 0            | 0.0   | 0         | 0.0   |                               | 0            | 0.0   | 0         | 0.0   |                               |
| Tumour size                      |              |       |           |       | <b>0.039<sup>a</sup></b>      |              |       |           |       | <b>0.034<sup>a</sup></b>      |
| ≤ 20 mm                          | 22           | 34.9  | 1         | 1.6   |                               | 21           | 33.3  | 2         | 3.2   |                               |
| >20 mm                           | 30           | 47.6  | 10        | 15.9  |                               | 27           | 42.9  | 13        | 20.6  |                               |
| N-stage                          |              |       |           |       | 0.069 <sup>a</sup>            |              |       |           |       | 0.093 <sup>a</sup>            |
| pN0                              | 30           | 47.6  | 3         | 4.8   |                               | 28           | 44.4  | 5         | 7.9   |                               |
| pN1                              | 22           | 34.9  | 8         | 12.7  |                               | 20           | 31.7  | 10        | 15.9  |                               |
| T-stage                          |              |       |           |       | <b>0.043<sup>a</sup></b>      |              |       |           |       | <b>0.014<sup>a</sup></b>      |
| pT1-T2                           | 15           | 23.8  | 0         | 0.0   |                               | 15           | 23.8  | 0         | 0.0   |                               |
| pT3-T4                           | 37           | 58.7  | 11        | 17.5  |                               | 33           | 52.4  | 15        | 23.8  |                               |
| R-margin status                  |              |       |           |       | 0.473 <sup>a</sup>            |              |       |           |       | 0.176 <sup>a</sup>            |
| R0                               | 15           | 23.8  | 2         | 3.2   |                               | 15           | 23.8  | 2         | 3.2   |                               |
| R1 or Rx                         | 37           | 58.7  | 9         | 14.3  |                               | 33           | 52.4  | 13        | 20.6  |                               |
| Perineural growth                |              |       |           |       | <b>&lt;0.0001<sup>a</sup></b> |              |       |           |       | <b>&lt;0.0001<sup>a</sup></b> |
| No growth                        | 42           | 66.7  | 2         | 3.2   |                               | 40           | 63.5  | 4         | 6.3   |                               |
| Perineural growth                | 10           | 15.9  | 9         | 14.3  |                               | 8            | 12.7  | 11        | 17.5  |                               |
| Cancer in lymph vessels          |              |       |           |       | 0.967 <sup>a</sup>            |              |       |           |       | 0.262 <sup>a</sup>            |
| No cancer                        | 24           | 38.1  | 5         | 7.9   |                               | 24           | 38.1  | 5         | 7.9   |                               |
| Cancer                           | 28           | 44.4  | 6         | 9.5   |                               | 24           | 38.1  | 10        | 15.9  |                               |
| Cancer in blood vessels          |              |       |           |       | 0.170 <sup>a</sup>            |              |       |           |       | 0.379 <sup>a</sup>            |
| No cancer                        | 49           | 77.8  | 9         | 14.3  |                               | 45           | 71.4  | 13        | 20.6  |                               |
| Cancer                           | 3            | 4.8   | 2         | 3.2   |                               | 3            | 4.8   | 2         | 3.2   |                               |
| Growth in peripancreatic fat     |              |       |           |       | <b>0.004<sup>a</sup></b>      |              |       |           |       | <b>0.003<sup>a</sup></b>      |
| No growth                        | 38           | 60.3  | 3         | 4.8   |                               | 36           | 57.1  | 5         | 7.9   |                               |
| Growth                           | 14           | 22.2  | 8         | 12.7  |                               | 12           | 19.0  | 10        | 15.9  |                               |

Abbreviations: COMP. cartilage oligomeric matrix protein; The bold indicates *p*-values <0.05. <sup>a</sup>Mann-Whitney two-tailed Exact *p*-value. <sup>b</sup>Kruskal-Wallis *p*-value.

Table S2 Associations of clinicopathological characteristics with COMP expression in patients with pancreatobiliary type of tumour morphology.

| Factor                           | Cancer cells |       |           |       |                          | Stroma cells |       |           |       |                          |
|----------------------------------|--------------|-------|-----------|-------|--------------------------|--------------|-------|-----------|-------|--------------------------|
|                                  | COMP low     |       | COMP high |       | p-value                  | COMP low     |       | COMP high |       | p-value                  |
|                                  | N            | (%)   | N         | (%)   |                          | N            | (%)   | N         | (%)   |                          |
| All (N=107)                      | 40           | 37.38 | 67        | 62.62 |                          | 25           | 23.36 | 82        | 76.63 |                          |
| Age at surgery                   |              |       |           |       | 0.780 <sup>b</sup>       |              |       |           |       | 0.252 <sup>b</sup>       |
| <50                              | 2            | 1.9   | 2         | 1.9   |                          | 0            | 0.0   | 4         | 3.7   |                          |
| 50-70                            | 24           | 22.4  | 44        | 41.1  |                          | 14           | 13.1  | 54        | 50.5  |                          |
| >70                              | 14           | 13.1  | 21        | 19.6  |                          | 11           | 10.3  | 24        | 22.4  |                          |
| Sex                              |              |       |           |       | 0.982 <sup>a</sup>       |              |       |           |       | 0.720 <sup>a</sup>       |
| Female                           | 18           | 16.8  | 30        | 28.0  |                          | 12           | 11.2  | 36        | 33.6  |                          |
| Male                             | 22           | 20.6  | 37        | 34.6  |                          | 13           | 12.1  | 46        | 43.0  |                          |
| Adjuvant vs no adjuvant          |              |       |           |       | 0.284 <sup>a</sup>       |              |       |           |       | 0.479 <sup>a</sup>       |
| No adjuvant                      | 21           | 19.6  | 28        | 26.2  |                          | 13           | 12.1  | 36        | 33.6  |                          |
| Adjuvant                         | 19           | 17.8  | 39        | 36.4  |                          | 12           | 11.2  | 46        | 43.0  |                          |
| Anatomical tumour origin         |              |       |           |       | 0.337 <sup>b</sup>       |              |       |           |       | 0.080 <sup>b</sup>       |
| Duodenum                         | 0            | 0.0   | 0         | 0.0   |                          | 0            | 0.0   | 0         | 0.0   |                          |
| Papilla-Ampulla Intestinal       | 0            | 0.0   | 0         | 0.0   |                          | 0            | 0.0   | 0         | 0.0   |                          |
| Papilla-Ampulla Pancreatobiliary | 9            | 8.4   | 10        | 9.3   |                          | 8            | 7.5   | 11        | 10.3  |                          |
| Distal Bile Duct                 | 18           | 16.8  | 26        | 24.3  |                          | 7            | 6.5   | 37        | 34.6  |                          |
| Pancreas                         | 13           | 12.1  | 31        | 29.0  |                          | 10           | 9.3   | 34        | 31.8  |                          |
| Tumour size                      |              |       |           |       | 0.052 <sup>a</sup>       |              |       |           |       | <b>0.022<sup>a</sup></b> |
| ≤ 20 mm                          | 9            | 8.4   | 6         | 5.6   |                          | 7            | 6.5   | 8         | 7.5   |                          |
| >20 mm                           | 31           | 29.0  | 61        | 57.0  |                          | 18           | 16.8  | 74        | 69.2  |                          |
| N-stage                          |              |       |           |       | 0.376 <sup>a</sup>       |              |       |           |       | 0.449 <sup>a</sup>       |
| pN0                              | 14           | 13.1  | 18        | 16.8  |                          | 9            | 8.4   | 23        | 21.5  |                          |
| pN1                              | 26           | 24.3  | 49        | 45.8  |                          | 16           | 15.0  | 59        | 55.1  |                          |
| T-stage                          |              |       |           |       | 0.651 <sup>a</sup>       |              |       |           |       | 0.623 <sup>a</sup>       |
| pT1-T2                           | 6            | 5.6   | 8         | 7.5   |                          | 4            | 3.7   | 10        | 9.3   |                          |
| pT3-T4                           | 34           | 31.8  | 59        | 55.1  |                          | 21           | 19.6  | 72        | 67.3  |                          |
| R-margin status                  |              |       |           |       | 0.513 <sup>a</sup>       |              |       |           |       | 0.114 <sup>a</sup>       |
| R0                               | 3            | 2.8   | 3         | 2.8   |                          | 3            | 2.8   | 3         | 2.8   |                          |
| R1 or Rx                         | 37           | 34.6  | 64        | 59.8  |                          | 22           | 20.6  | 79        | 73.8  |                          |
| Perineural growth                |              |       |           |       | <b>0.017<sup>a</sup></b> |              |       |           |       | <b>0.003<sup>a</sup></b> |
| No growth                        | 14           | 13.1  | 10        | 9.3   |                          | 11           | 10.3  | 13        | 12.1  |                          |
| Perineural growth                | 26           | 24.3  | 57        | 53.3  |                          | 14           | 13.1  | 69        | 64.5  |                          |
| Cancer in lymph vessels          |              |       |           |       | 0.775 <sup>a</sup>       |              |       |           |       | 0.887 <sup>a</sup>       |
| No cancer                        | 13           | 12.1  | 20        | 18.7  |                          | 8            | 7.5   | 25        | 23.4  |                          |
| Cancer                           | 27           | 25.2  | 47        | 43.9  |                          | 17           | 15.9  | 57        | 53.3  |                          |
| Cancer in blood vessels          |              |       |           |       | 0.944 <sup>a</sup>       |              |       |           |       | 0.206 <sup>a</sup>       |
| No cancer                        | 26           | 24.3  | 44        | 41.1  |                          | 19           | 17.8  | 51        | 47.7  |                          |
| Cancer                           | 14           | 13.1  | 23        | 21.5  |                          | 6            | 5.6   | 31        | 29.0  |                          |
| Growth in peripancreatic fat     |              |       |           |       | 0.100 <sup>a</sup>       |              |       |           |       | <b>0.002<sup>a</sup></b> |
| No growth                        | 12           | 11.2  | 11        | 10.3  |                          | 11           | 10.3  | 12        | 11.2  |                          |
| Growth                           | 28           | 26.2  | 56        | 52.3  |                          | 14           | 13.1  | 70        | 65.4  |                          |

Abbreviations: COMP. cartilage oligomeric matrix protein; The bold indicates p-values <0.05. <sup>a</sup>Mann-Whitney two-tailed Exact p-value. <sup>b</sup>Kruskal-Wallis p-value.

Table S3 Cox multivariable analyses of overall and recurrence free survival

| <b>Overall survival</b>              |                     |               |                  |               |               |                |
|--------------------------------------|---------------------|---------------|------------------|---------------|---------------|----------------|
| <b>Variable</b>                      | <b>Cancer cells</b> |               |                  | <b>Stroma</b> |               |                |
|                                      | <b>HR</b>           | <b>95% CI</b> | <b>p-value</b>   | <b>HR</b>     | <b>95% CI</b> | <b>p-value</b> |
| COMP (0-1 vs 2-3)                    | 1.487               | 1.280-2.650   | <b>0.001</b>     | 2.018         | 1.358-2.999   | <b>0.001</b>   |
| Adjuvant therapy (no vs any)         | 0.860               | 0.505-1.053   | 0.092            | 0.686         | 0.474-0.995   | <b>0.047</b>   |
| Tumour size ( $\leq$ 20 mm vs >20mm) | 1.143               | 0.559-1.717   | 0.943            | 0.982         | 0.569-1.695   | 0.949          |
| Tumour grade (poor vs others)        | 1.507               | 1.258-2.718   | <b>0.002</b>     | 1.742         | 1.188-2.555   | <b>0.004</b>   |
| N-stages (N0 vs others)              | 1.812               | 1.311-3.013   | <b>0.001</b>     | 1.910         | 1.262-2.893   | <b>0.002</b>   |
| T-stage (1-2 vs 3-4)                 | 2.114               | 1.087-3.816   | <b>0.027</b>     | 1.985         | 1.058-3.725   | <b>0.033</b>   |
| <b>Recurrence-free survival</b>      |                     |               |                  |               |               |                |
| <b>Variable</b>                      | <b>Cancer cells</b> |               |                  | <b>Stroma</b> |               |                |
|                                      | <b>HR</b>           | <b>95% CI</b> | <b>p-value</b>   | <b>HR</b>     | <b>95% CI</b> | <b>p-value</b> |
| COMP (0-1 vs 2-3)                    | 1.596               | 1.090-2.337   | <b>0.016</b>     | 1.795         | 1.181-2.728   | <b>0.006</b>   |
| Adjuvant therapy (no vs any)         | 0.764               | 0.521-1.121   | 0.169            | 0.739         | 0.502-1.087   | 0.124          |
| Tumour size ( $\leq$ 20 mm vs >20mm) | 1.143               | 0.631-2.068   | 0.660            | 1.173         | 0.661-2.082   | 0.586          |
| Tumour grade (poor vs others)        | 1.661               | 1.116-2.472   | <b>0.012</b>     | 1.612         | 1.084-2.397   | <b>0.018</b>   |
| N-stages (N0 vs others)              | 2.191               | 1.410-3.404   | <b>&lt;0.001</b> | 2.089         | 1.348-3.236   | <b>0.001</b>   |
| T-stage (1-2 vs 3-4)                 | 2.391               | 1.202-4.758   | <b>0.013</b>     | 2.277         | 1.152-4.499   | <b>0.018</b>   |

Abbreviations: COMP, cartilage oligomeric matrix protein. The bold indicates  $p$ -values  $<0.05$ .

Table S4 Distribution of clinicopathological characteristics in patients with and without lymph node metastases.

| Factor                           | Metastatic patients |      | Non-metastatic patients |      |
|----------------------------------|---------------------|------|-------------------------|------|
|                                  | N                   | (%)  | N                       | (%)  |
| All (N=170)                      |                     |      |                         |      |
| Age at surgery                   |                     |      |                         |      |
| <50                              | 7                   | 0.04 | 5                       | 0.03 |
| 50-70                            | 69                  | 0.41 | 38                      | 0.22 |
| >70                              | 29                  | 0.17 | 22                      | 0.13 |
| Sex                              |                     |      |                         |      |
| Female                           | 45                  | 0.26 | 37                      | 0.22 |
| Male                             | 60                  | 0.35 | 28                      | 0.16 |
| Adjuvant vs no adjuvant          |                     |      |                         |      |
| No adjuvant                      | 49                  | 0.29 | 45                      | 0.26 |
| Adjuvant                         | 56                  | 0.33 | 20                      | 0.12 |
| Anatomical tumour origin         |                     |      |                         |      |
| Duodenum                         | 6                   | 0.04 | 8                       | 0.05 |
| Papilla-Ampulla Intestinal       | 24                  | 0.14 | 25                      | 0.15 |
| Papilla-Ampulla Pancreatobiliary | 16                  | 0.09 | 3                       | 0.02 |
| Distal Bile Duct                 | 26                  | 0.15 | 18                      | 0.11 |
| Pancreas                         | 33                  | 0.19 | 11                      | 0.06 |
| Tumour size                      |                     |      |                         |      |
| ≤ 20 mm                          | 13                  | 0.08 | 25                      | 0.15 |
| >20 mm                           | 92                  | 0.54 | 40                      | 0.24 |
| T-stage                          |                     |      |                         |      |
| pT1-T2                           | 12                  | 0.07 | 17                      | 0.10 |
| pT3-T4                           | 93                  | 0.55 | 48                      | 0.28 |
| R-margin status                  |                     |      |                         |      |
| R0                               | 9                   | 0.05 | 14                      | 0.08 |
| R1 or Rx                         | 96                  | 0.56 | 51                      | 0.30 |
| Perineural growth                |                     |      |                         |      |
| No growth                        | 25                  | 0.15 | 43                      | 0.25 |
| Perineural growth                | 80                  | 0.47 | 22                      | 0.13 |
| Cancer in lymph vessels          |                     |      |                         |      |
| No cancer                        | 27                  | 0.16 | 35                      | 0.21 |
| Cancer                           | 78                  | 0.46 | 30                      | 0.18 |
| Cancer in blood vessels          |                     |      |                         |      |
| No cancer                        | 74                  | 0.44 | 54                      | 0.32 |
| Cancer                           | 31                  | 0.18 | 11                      | 0.06 |
| Growth in peripancreatic fat     |                     |      |                         |      |
| No growth                        | 22                  | 0.13 | 42                      | 0.25 |
| Growth                           | 83                  | 0.49 | 23                      | 0.14 |



Table S5 Panel of antibodies utilised to detect the different populations of immune cells.

| <b>Target</b>             | <b>Supplier</b>            | <b>Catalogue number</b> | <b>Dilution</b> |
|---------------------------|----------------------------|-------------------------|-----------------|
| CD4                       | DAKO                       | M7310                   | 1:200           |
| CD8 $\alpha$              | Thermo Fisher Scientific   | MA5-13473               | 1:500           |
| FoxP3                     | Cell Signalling Technology | 12653                   | 1:100           |
| CD20                      | DAKO                       | GA604                   | 1:3000          |
| CD45RO                    | Thermo Fisher Scientific   | MA1-19452               | 1:200           |
| CD68                      | Dako, Agilent Technologies | M0876                   | 1:100           |
| CD163                     | Atlas Antibodies           | HPA046404               | 1:100           |
| NKp46                     | Thermo Fisher Scientific   | PA5-79720               | 1:150           |
| CD56                      | Dako, Agilent Technologies | M730429-2               | 1:100           |
| CD3                       | Dako, Agilent Technologies | M725429-2               | 1:80            |
| CD1a                      | Dako, Agilent Technologies | M357101-2               | 1:400           |
| CD208                     | Thermo Fisher Scientific   | PA5-84069               | 1:50            |
| CD123                     | Sigma                      | 198M-14                 | 1:20            |
| CD15                      | Sigma,                     | M3631                   | 1:100           |
| E-cadherin                | BD Biosciences             | 610182                  | 1:5000          |
| pan Cytokeratin           | Abcam                      | ab7753                  | 1:1000          |
| pan Cytokeratin Type I/II | Thermo Fisher Scientific   | MA5-13156               | 1:500           |
